# Supplementary material for: Senolytic Therapy for Cerebral Ischemia-Reperfusion Injury
Source: MDPI journal article supplement (doi:10.3390/ijms222111967), 2021-11-04
Supplement: s1 [file s1]

Supplementary File

## Senolytic therapy for cerebral ischemia-reperfusion injury

Songhyun Lim, Tae Jung Kim, Young-Ju Kim, Cheesue Kim, Sang-Bae Ko\*, Byung-Soo Kim\*

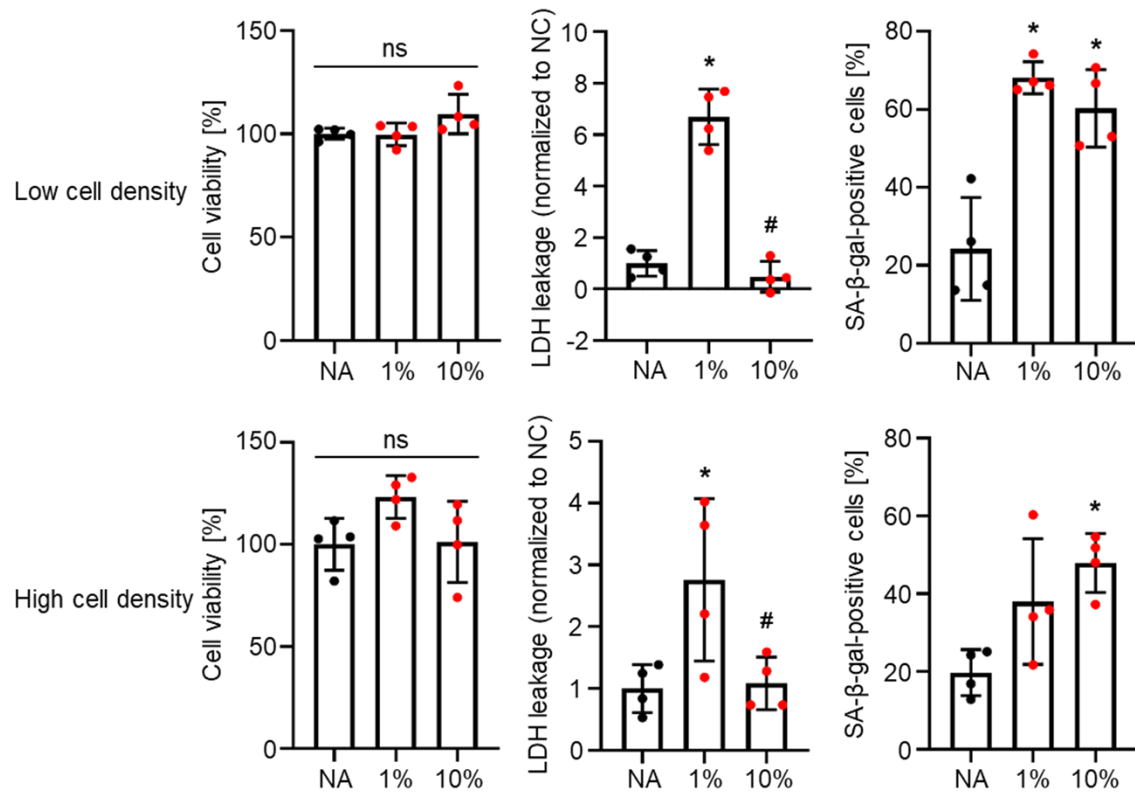

**Figure S1.** Effects of cell density and serum concentration of the culture medium on in vitro induction of senescence in OGD/R-injured astrocytes. Cell viability measured by MTT assay and LDH release, and quantification of SA-β-gal staining of normal astrocytes (NA) and astrocytes injured by OGD/R with two different serum concentrations (1% and 10%).  $n = 4$  per group. \* $P < 0.05$  compared to NC, # $P < 0.05$  compared to 1%. Data are presented as mean  $\pm$  SD. One-way ANOVA with Tukey's post-test was used for statistical analysis.
